# Supplementary material for: The impact of the COVID-19 pandemic on the lifestyle and behaviours, mental health and education of students studying healthcare-related courses at a British university
Source: Springer Nature journal article supplement (doi:10.1186/s12909-022-03179-z), 2022-02-21
Supplement: MOESM2 [file 12909_2022_3179_MOESM2_ESM.pdf]

# The impact of COVID-19 on the mental health and education of students at a British University.

Showing 233 of 233 responses

Showing **all** responses

Showing **all** questions

Response rate: 233%

## 1 What course do you study?

| Showing all 232 responses |                        |
|---------------------------|------------------------|
| Medicine                  | 611710-611701-63868315 |
| Medicine MbChB            | 611710-611701-64904945 |
| Medicine                  | 611710-611701-64905108 |
| Medicine                  | 611710-611701-64905508 |
| Medicine                  | 611710-611701-64905997 |
| Medicine                  | 611710-611701-64906133 |
| Medicine                  | 611710-611701-64906117 |
| Medicine                  | 611710-611701-64906786 |
| Medicine                  | 611710-611701-64908178 |
| Medicine                  | 611710-611701-64908956 |
| Medicine                  | 611710-611701-64910550 |
| Medicine                  | 611710-611701-64911954 |
| Medicine                  | 611710-611701-64912202 |
| Medicine                  | 611710-611701-64912999 |
| Medicine                  | 611710-611701-64913058 |
| Medicine                  | 611710-611701-64913721 |
| Medicine                  | 611710-611701-64914840 |
| Medicine                  | 611710-611701-64917154 |
| Medicine                  | 611710-611701-64921771 |
| Medicine                  | 611710-611701-64924303 |
| Medicine                  | 611710-611701-64928259 |

|                                   |                        |
|-----------------------------------|------------------------|
| Medicine                          | 611710-611701-64975966 |
| Medicine                          | 611710-611701-65180318 |
| Medicine                          | 611710-611701-65180949 |
| Medicine                          | 611710-611701-65238328 |
| Medicine                          | 611710-611701-65238969 |
| Paramedic Science                 | 611710-611701-65339701 |
| Paramedic science                 | 611710-611701-65339700 |
| MRI MSc                           | 611710-611701-65339699 |
| Paramedic studies                 | 611710-611701-65339690 |
| Medical Science                   | 611710-611701-65339766 |
| Paramedic science                 | 611710-611701-65339840 |
| Medical science                   | 611710-611701-65339703 |
| BSc Paramedic Science             | 611710-611701-65339825 |
| Msc healthcare management         | 611710-611701-65339818 |
| Medical science                   | 611710-611701-65339708 |
| BSc (Hons) Paramedic Science      | 611710-611701-65339861 |
| Operating department practitioner | 611710-611701-65339886 |
| MSc Healthcare Management         | 611710-611701-65339765 |
| Operating department Practitioner | 611710-611701-65339824 |
| MSc Pharmaceutical Sciences       | 611710-611701-65339804 |
| Medical Science                   | 611710-611701-65339712 |
| Medical Science BSc               | 611710-611701-65339893 |
| Nutritional science               | 611710-611701-65340223 |
| MBA healthcare management         | 611710-611701-65340228 |
| MBA healthcare Management         | 611710-611701-65339978 |
| Paramedic science                 | 611710-611701-65339809 |
| Public Health                     | 611710-611701-65340293 |
| Medical Science                   | 611710-611701-65340410 |
| Pharmaceutical science            | 611710-611701-65340365 |
| Paramedic Science                 | 611710-611701-65340650 |
| Operating Department Practice     | 611710-611701-65340388 |
| paramedic science                 | 611710-611701-65340847 |
| Paramedic science (BSc)           | 611710-611701-65339855 |

|                                      |                        |
|--------------------------------------|------------------------|
| Medical Science                      | 611710-611701-65340923 |
| Operating department practitioner    | 611710-611701-65339954 |
| Paramedic Science                    | 611710-611701-65340939 |
| Medical Science                      | 611710-611701-65340898 |
| Operating department practice        | 611710-611701-65340848 |
| BSc (Hons) Medical Science           | 611710-611701-65341347 |
| Paramedic                            | 611710-611701-65341388 |
| Msc MRI                              | 611710-611701-65341475 |
| Paramedic science                    | 611710-611701-65341123 |
| Paramedic science                    | 611710-611701-65342091 |
| ODP                                  | 611710-611701-65341995 |
| BSc paramedic science                | 611710-611701-65339772 |
| Paramedic Science                    | 611710-611701-65342358 |
| Medical science                      | 611710-611701-65342802 |
| Medical science                      | 611710-611701-65343006 |
| Pharmaceutical Science               | 611710-611701-65339702 |
| MSc Healthcare Management            | 611710-611701-65343532 |
| Medical science                      | 611710-611701-65344014 |
| MSC Healthcare Management            | 611710-611701-65344745 |
| medical science with foundation year | 611710-611701-65344919 |
| Physician Associate MCs              | 611710-611701-65346039 |
| Medical science                      | 611710-611701-65346751 |
| paramedic science                    | 611710-611701-65347433 |
| Paramedic Science                    | 611710-611701-65347985 |
| Paramedic science                    | 611710-611701-65348095 |
| Paramedic Science                    | 611710-611701-65348420 |
| BSc Paramedic Science                | 611710-611701-65348617 |
| Paramedical science                  | 611710-611701-65348729 |
| Public Health                        | 611710-611701-65350542 |
| Paramedic Science                    | 611710-611701-65351175 |
| Bsc Paramedic Science                | 611710-611701-65351672 |
| MSc public health                    | 611710-611701-65351589 |
| Paramedic science                    | 611710-611701-65353054 |

|                                                         |                        |
|---------------------------------------------------------|------------------------|
| Paramedic science                                       | 611710-611701-65353753 |
| Bsc management and leadership in health and social care | 611710-611701-65353859 |
| Healthcare management mba                               | 611710-611701-65355362 |
| Paramedic Science                                       | 611710-611701-65355666 |
| Dip Ed paramedic                                        | 611710-611701-65351657 |
| Paramedic Science                                       | 611710-611701-65356103 |
| Operating Department Practice                           | 611710-611701-65357763 |
| Paramedic Science                                       | 611710-611701-65358813 |
| Msc public health                                       | 611710-611701-65358699 |
| Paramedic science                                       | 611710-611701-65358950 |
| Medicine                                                | 611710-611701-65360204 |
| Medicine                                                | 611710-611701-65360786 |
| BSc (Hons) Paramedic Science                            | 611710-611701-65362055 |
| Medicine                                                | 611710-611701-65363079 |
| Paramedic Science                                       | 611710-611701-65363373 |
| Msc public health                                       | 611710-611701-65363646 |
| Public health MSc                                       | 611710-611701-65364335 |
| Medical science                                         | 611710-611701-65365724 |
| BSc Public health                                       | 611710-611701-65366876 |
| Medical science                                         | 611710-611701-65367249 |
| MSc. Physician Associate                                | 611710-611701-65367775 |
| Physician Associate Studies                             | 611710-611701-65369259 |
| Medical science                                         | 611710-611701-65375617 |
| operating department praction                           | 611710-611701-65376195 |
| Paramedic science                                       | 611710-611701-65377486 |
| ODP                                                     | 611710-611701-65380858 |
| Paramedic science                                       | 611710-611701-65382930 |
| Pharmaceutical science                                  | 611710-611701-65394778 |
| BSc(Hons) Public Health                                 | 611710-611701-65394930 |
| Public health                                           | 611710-611701-65396871 |
| Paramedic Science                                       | 611710-611701-65404525 |
| Paramedic science                                       | 611710-611701-65407022 |
| ODP                                                     | 611710-611701-65410678 |

|                                      |                        |
|--------------------------------------|------------------------|
| medical science                      | 611710-611701-65417826 |
| MSc Physician Associate              | 611710-611701-65420112 |
| Public health                        | 611710-611701-65423303 |
| MSc public health                    | 611710-611701-65430088 |
| ODP                                  | 611710-611701-65434612 |
| Bsc (Hons) Medical science           | 611710-611701-65440867 |
| masters in public health             | 611710-611701-65441962 |
| mental health nursing                | 611710-611701-65443108 |
| MSc Healthcare Management            | 611710-611701-65444987 |
| Medical science                      | 611710-611701-65447207 |
| Pharmaceutical science               | 611710-611701-65447865 |
| BSc Public Health                    | 611710-611701-65450534 |
| BsC honours medical science          | 611710-611701-65453185 |
| Paramedic Science                    | 611710-611701-65471280 |
| ODP                                  | 611710-611701-65471517 |
| Biomedical science                   | 611710-611701-65483704 |
| odp                                  | 611710-611701-65484370 |
| Pharmaceutical science               | 611710-611701-65512965 |
| PhD                                  | 611710-611701-65543617 |
| medicine                             | 611710-611701-65559487 |
| Operating Department Practice        | 611710-611701-65571031 |
| PhD Medical Science                  | 611710-611701-65579375 |
| Medicine                             | 611710-611701-65580622 |
| BSc Medical Science                  | 611710-611701-65582736 |
| Adult Nursing                        | 611710-611701-65590713 |
| Operating department practice        | 611710-611701-65582499 |
| Medicine                             | 611710-611701-65605735 |
| Leadership in health and social care | 611710-611701-65605489 |
| Physician Associate                  | 611710-611701-65618375 |
| Nursing                              | 611710-611701-65632523 |
| Paramedic Science                    | 611710-611701-65647057 |
| Medicine                             | 611710-611701-65656449 |
| Medicine                             | 611710-611701-65657915 |

|                                            |                        |
|--------------------------------------------|------------------------|
| Medicine                                   | 611710-611701-65677803 |
| adult nursing                              | 611710-611701-65677803 |
| Medical Science                            | 611710-611701-65680201 |
| MENTAL HEALTH                              | 611710-611701-65684000 |
| Public Health                              | 611710-611701-65689916 |
| MA Social Work                             | 611710-611701-65693396 |
| EdD                                        | 611710-611701-65695895 |
| Medicine                                   | 611710-611701-65697993 |
| Medicine                                   | 611710-611701-65727947 |
| BA Social Work                             | 611710-611701-65744048 |
| BSc(HONS)international Business management | 611710-611701-65754244 |
| Msc public health                          | 611710-611701-65757495 |
| child nursing                              | 611710-611701-65757957 |
| Medicine                                   | 611710-611701-65776398 |
| Operation Department Practitioner          | 611710-611701-65797593 |
| Adult nursing                              | 611710-611701-65823469 |
| MA Early Childhood Education               | 611710-611701-65833592 |
| ODP                                        | 611710-611701-65838732 |
| Business Management                        | 611710-611701-65880395 |
| MSc in HealthCare Management               | 611710-611701-65895037 |
| Early Childhood Studies                    | 611710-611701-65947725 |
| Medicine                                   | 611710-611701-65952652 |
| Medicine                                   | 611710-611701-65952660 |
| medicine                                   | 611710-611701-65952716 |
| Medicine                                   | 611710-611701-65952826 |
| Medicine                                   | 611710-611701-65952856 |
| Medicine                                   | 611710-611701-65952944 |
| Medicine                                   | 611710-611701-65953035 |
| Medicine                                   | 611710-611701-65953635 |
| Medicine                                   | 611710-611701-65954555 |
| Medicine                                   | 611710-611701-65955274 |
| Medicine                                   | 611710-611701-65959417 |
| PhD Health and Social Care                 | 611710-611701-65968379 |
| BSc in Nursing (Adults)                    | 611710-611701-65973133 |

|                               |                        |
|-------------------------------|------------------------|
| BSc. Nursing (Adult)          | 611710-611701-65972122 |
| Adult Nurse                   | 611710-611701-66017384 |
| Diploma in Paramedic Science  | 611710-611701-66022412 |
| Social Work BA                | 611710-611701-66034596 |
| BA Early Childhood Studies    | 611710-611701-66040870 |
| Medicine                      | 611710-611701-66163273 |
| PhD                           | 611710-611701-66240947 |
| MSc public health             | 611710-611701-66315099 |
| Adult nursing                 | 611710-611701-66400566 |
| Master's in Public Health     | 611710-611701-66473167 |
| Midwifery                     | 611710-611701-66730747 |
| Midwifery                     | 611710-611701-66731179 |
| Midwifery                     | 611710-611701-66731323 |
| Midwifery                     | 611710-611701-66731367 |
| Midwifery                     | 611710-611701-66731385 |
| Midwifery                     | 611710-611701-66731500 |
| Midwifery                     | 611710-611701-66731616 |
| Midwifery                     | 611710-611701-66731604 |
| Midwifery                     | 611710-611701-66733611 |
| Primary education studies     | 611710-611701-66737100 |
| Midwifery                     | 611710-611701-66738777 |
| Bsc midwifery                 | 611710-611701-66739149 |
| Midwifery                     | 611710-611701-66750717 |
| Primary Education             | 611710-611701-66753644 |
| Child Nursing                 | 611710-611701-66766928 |
| Paramedic science             | 611710-611701-66832802 |
| Paediatric Nursing            | 611710-611701-66894318 |
| Mental Health Nursing         | 611710-611701-66894651 |
| Adult Nursing                 | 611710-611701-66906613 |
| Operating Department Practice | 611710-611701-66936452 |
| mental health nursing         | 611710-611701-66947932 |
| midwifery                     | 611710-611701-66948498 |
| Adult nursing                 | 611710-611701-66978483 |

|                       |                        |
|-----------------------|------------------------|
| Social Work           | 611710-611701-67017947 |
| social work           | 611710-611701-67025772 |
| Medicine              | 611710-611701-67046848 |
| Medicine              | 611710-611701-67046840 |
| BA Social Work        | 611710-611701-67064075 |
| Adult Nursing         | 611710-611701-67082205 |
| BSc Adult Nursinf     | 611710-611701-67084380 |
| Adult Nursing         | 611710-611701-67084975 |
| Nursing               | 611710-611701-67090483 |
| Medicine              | 611710-611701-67189021 |
| Mental nursing        | 611710-611701-67253342 |
| Paramedic Science     | 611710-611701-67254500 |
| mental health nursing | 611710-611701-67272372 |
| Mental health nursing | 611710-611701-67274548 |

## 2 What year of study are you in/ will you be in the academic year 2020/2021?

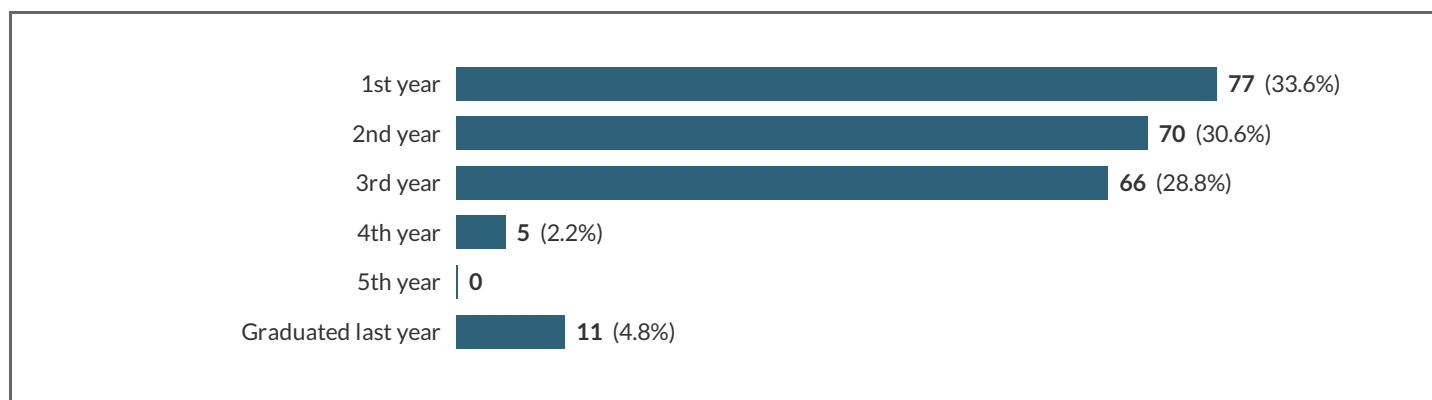

## 3 Gender?

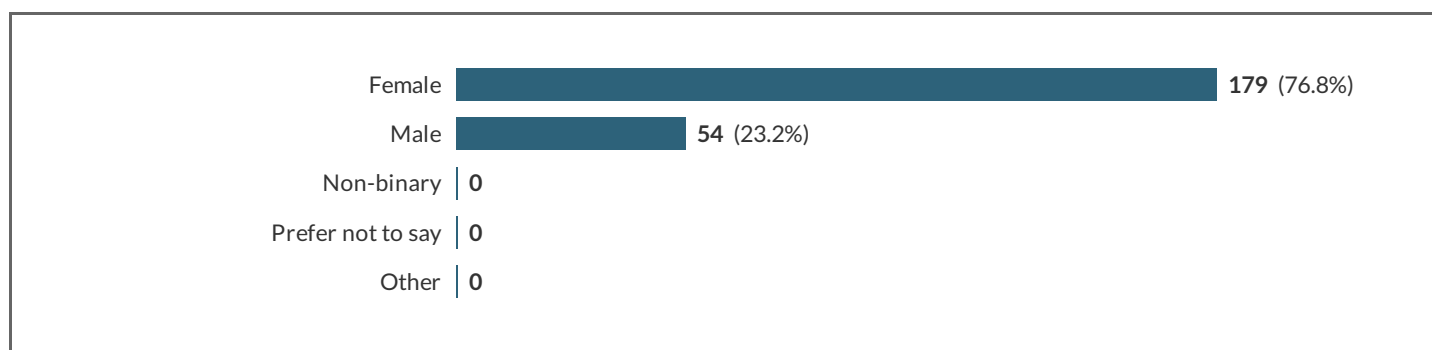



3.a If you selected Other, please specify how you prefer to self-describe:

No responses

4 Age?

| Showing all 233 responses |                        |
|---------------------------|------------------------|
| 23                        | 611710-611701-63868315 |
| 23                        | 611710-611701-64904945 |
| 20                        | 611710-611701-64905108 |
| 21                        | 611710-611701-64905508 |
| 20                        | 611710-611701-64905997 |
| 19                        | 611710-611701-64906133 |
| 20                        | 611710-611701-64906117 |
| 21                        | 611710-611701-64906786 |
| 21                        | 611710-611701-64908178 |
| 20                        | 611710-611701-64908956 |
| 26                        | 611710-611701-64910550 |
| 23                        | 611710-611701-64911954 |
| 20                        | 611710-611701-64912202 |
| 23                        | 611710-611701-64912999 |
| 24                        | 611710-611701-64913058 |
| 21                        | 611710-611701-64913721 |
| 26                        | 611710-611701-64914840 |
| 20                        | 611710-611701-64917154 |
| 26                        | 611710-611701-64921771 |
| 20                        | 611710-611701-64924303 |
| 20                        | 611710-611701-64928259 |
| 20                        | 611710-611701-64975966 |
| 20                        | 611710-611701-65180318 |
| 19                        | 611710-611701-65180949 |
| 19                        | 611710-611701-65238328 |
| 23                        | 611710-611701-65238969 |
| 20                        | 611710-611701-65339701 |

|    |                        |
|----|------------------------|
| 19 | 611710-611701-65339700 |
| 34 | 611710-611701-65339699 |
| 37 | 611710-611701-65339690 |
| 22 | 611710-611701-65339766 |
| 21 | 611710-611701-65339840 |
| 21 | 611710-611701-65339703 |
| 27 | 611710-611701-65339825 |
| 33 | 611710-611701-65339818 |
| 40 | 611710-611701-65339708 |
| 22 | 611710-611701-65339861 |
| 18 | 611710-611701-65339886 |
| 44 | 611710-611701-65339765 |
| 25 | 611710-611701-65339824 |
| 23 | 611710-611701-65339804 |
| 21 | 611710-611701-65339712 |
| 34 | 611710-611701-65339893 |
| 25 | 611710-611701-65340223 |
| 25 | 611710-611701-65340228 |
| 25 | 611710-611701-65339978 |
| 21 | 611710-611701-65339809 |
| 21 | 611710-611701-65340293 |
| 20 | 611710-611701-65340410 |
| 19 | 611710-611701-65340365 |
| 20 | 611710-611701-65340650 |
| 54 | 611710-611701-65340388 |
| 20 | 611710-611701-65340847 |
| 20 | 611710-611701-65339855 |
| 21 | 611710-611701-65340923 |
| 27 | 611710-611701-65339954 |
| 21 | 611710-611701-65340939 |
| 25 | 611710-611701-65340898 |
| 33 | 611710-611701-65340848 |
| 20 | 611710-611701-65341347 |

|    |                        |
|----|------------------------|
| 42 | 611710-611701-65341388 |
| 34 | 611710-611701-65341475 |
| 35 | 611710-611701-65341123 |
| 21 | 611710-611701-65342091 |
| 28 | 611710-611701-65341995 |
| 19 | 611710-611701-65339772 |
| 21 | 611710-611701-65342358 |
| 27 | 611710-611701-65342802 |
| 18 | 611710-611701-65343006 |
| 23 | 611710-611701-65339702 |
| 43 | 611710-611701-65343532 |
| 20 | 611710-611701-65344014 |
| 40 | 611710-611701-65344745 |
| 17 | 611710-611701-65344919 |
| 36 | 611710-611701-65346039 |
| 57 | 611710-611701-65346751 |
| 22 | 611710-611701-65347433 |
| 20 | 611710-611701-65347985 |
| 19 | 611710-611701-65348095 |
| 31 | 611710-611701-65348420 |
| 22 | 611710-611701-65348617 |
| 21 | 611710-611701-65348729 |
| 19 | 611710-611701-65350542 |
| 21 | 611710-611701-65351175 |
| 19 | 611710-611701-65351672 |
| 25 | 611710-611701-65351589 |
| 22 | 611710-611701-65353054 |
| 20 | 611710-611701-65353753 |
| 28 | 611710-611701-65353859 |
| 32 | 611710-611701-65355362 |
| 20 | 611710-611701-65355666 |
| 42 | 611710-611701-65351657 |
| 20 | 611710-611701-65356103 |

|         |                        |
|---------|------------------------|
| 20      | 611710-611701-65356103 |
| 22      | 611710-611701-65357763 |
| 19      | 611710-611701-65358813 |
| 26      | 611710-611701-65358699 |
| 34      | 611710-611701-65358950 |
| 20      | 611710-611701-65360204 |
| 19      | 611710-611701-65360786 |
| 21      | 611710-611701-65362055 |
| 20      | 611710-611701-65363079 |
| 23      | 611710-611701-65363373 |
| 25      | 611710-611701-65363646 |
| 46      | 611710-611701-65364335 |
| 43 años | 611710-611701-65365724 |
| 20      | 611710-611701-65366876 |
| 20      | 611710-611701-65367249 |
| 35      | 611710-611701-65367775 |
| 22      | 611710-611701-65369259 |
| 18      | 611710-611701-65375617 |
| 21      | 611710-611701-65376195 |
| 30      | 611710-611701-65377486 |
| 19      | 611710-611701-65380858 |
| 21      | 611710-611701-65382930 |
| 20      | 611710-611701-65394778 |
| 43      | 611710-611701-65394930 |
| 22      | 611710-611701-65396871 |
| 29      | 611710-611701-65404525 |
| 41      | 611710-611701-65407022 |
| 39      | 611710-611701-65410678 |
| 20      | 611710-611701-65417826 |
| 22      | 611710-611701-65420112 |
| 31      | 611710-611701-65423303 |
| 59      | 611710-611701-65430088 |
| 21      | 611710-611701-65434612 |
| 20      | 611710-611701-65440007 |

|       |                        |
|-------|------------------------|
| 18    | 611710-611701-65440867 |
| 28    | 611710-611701-65441962 |
| 46    | 611710-611701-65443108 |
| 39    | 611710-611701-65444987 |
| 33    | 611710-611701-65447207 |
| 21    | 611710-611701-65447865 |
| 50    | 611710-611701-65450534 |
| 18    | 611710-611701-65453185 |
| 21    | 611710-611701-65471280 |
| 38    | 611710-611701-65471517 |
| 25    | 611710-611701-65483704 |
| 38    | 611710-611701-65484370 |
| 22    | 611710-611701-65512965 |
| 24    | 611710-611701-65543617 |
| 20    | 611710-611701-65559487 |
| 54    | 611710-611701-65571031 |
| 24    | 611710-611701-65579375 |
| 20    | 611710-611701-65580622 |
| 21    | 611710-611701-65582736 |
| 47    | 611710-611701-65590713 |
| 28    | 611710-611701-65582499 |
| 20    | 611710-611701-65605735 |
| 32    | 611710-611701-65605489 |
| 46    | 611710-611701-65618375 |
| 27    | 611710-611701-65632523 |
| 24    | 611710-611701-65647057 |
| 20    | 611710-611701-65656449 |
| 19    | 611710-611701-65657915 |
| 37    | 611710-611701-65677803 |
| 19    | 611710-611701-65680201 |
| 30-40 | 611710-611701-65684000 |
| 21    | 611710-611701-65689916 |
| 38    | 611710-611701-65693396 |

|    |                        |
|----|------------------------|
| 62 | 611710-611701-65695895 |
| 20 | 611710-611701-65697993 |
| 20 | 611710-611701-65727947 |
| 47 | 611710-611701-65744048 |
| 45 | 611710-611701-65754244 |
| 27 | 611710-611701-65757495 |
| 18 | 611710-611701-65757957 |
| 28 | 611710-611701-65776398 |
| 59 | 611710-611701-65797593 |
| 19 | 611710-611701-65823469 |
| 26 | 611710-611701-65833592 |
| 20 | 611710-611701-65838732 |
| 27 | 611710-611701-65880395 |
| 41 | 611710-611701-65895037 |
| 43 | 611710-611701-65947725 |
| 18 | 611710-611701-65952652 |
| 19 | 611710-611701-65952660 |
| 19 | 611710-611701-65952716 |
| 18 | 611710-611701-65952826 |
| 20 | 611710-611701-65952856 |
| 21 | 611710-611701-65952944 |
| 18 | 611710-611701-65953035 |
| 19 | 611710-611701-65953635 |
| 18 | 611710-611701-65954555 |
| 18 | 611710-611701-65955274 |
| 23 | 611710-611701-65959417 |
| 30 | 611710-611701-65968379 |
| 39 | 611710-611701-65972122 |
| 23 | 611710-611701-66017384 |
| 50 | 611710-611701-66022412 |
| 35 | 611710-611701-66034596 |
| 40 | 611710-611701-66040870 |
| 21 | 611710-611701-66163273 |

|    |                        |
|----|------------------------|
| 54 | 611710-611701-66180510 |
| 37 | 611710-611701-66240947 |
| 30 | 611710-611701-66315099 |
| 18 | 611710-611701-66400566 |
| 25 | 611710-611701-66473167 |
| 18 | 611710-611701-66730747 |
| 28 | 611710-611701-66731179 |
| 29 | 611710-611701-66731323 |
| 18 | 611710-611701-66731367 |
| 18 | 611710-611701-66731385 |
| 20 | 611710-611701-66731500 |
| 21 | 611710-611701-66731616 |
| 19 | 611710-611701-66731604 |
| 18 | 611710-611701-66733611 |
| 20 | 611710-611701-66737100 |
| 22 | 611710-611701-66738777 |
| 28 | 611710-611701-66739149 |
| 18 | 611710-611701-66750717 |
| 24 | 611710-611701-66753644 |
| 31 | 611710-611701-66766928 |
| 21 | 611710-611701-66832802 |
| 37 | 611710-611701-66894318 |
| 39 | 611710-611701-66894651 |
| 28 | 611710-611701-66906613 |
| 43 | 611710-611701-66936452 |
| 32 | 611710-611701-66947932 |
| 31 | 611710-611701-66948498 |
| 40 | 611710-611701-66978483 |
| 20 | 611710-611701-67017947 |
| 22 | 611710-611701-67025772 |
| 19 | 611710-611701-67046848 |
| 23 | 611710-611701-67046840 |
| 34 | 611710-611701-67064075 |

|    |                        |
|----|------------------------|
| 24 | 611710-611701-67082205 |
| 19 | 611710-611701-67084380 |
| 25 | 611710-611701-67084975 |
| 19 | 611710-611701-67090483 |
| 19 | 611710-611701-67189021 |
| 31 | 611710-611701-67253342 |
| 39 | 611710-611701-67254500 |
| 32 | 611710-611701-67272372 |
| 44 | 611710-611701-67274548 |

## 5 Ethnicity?

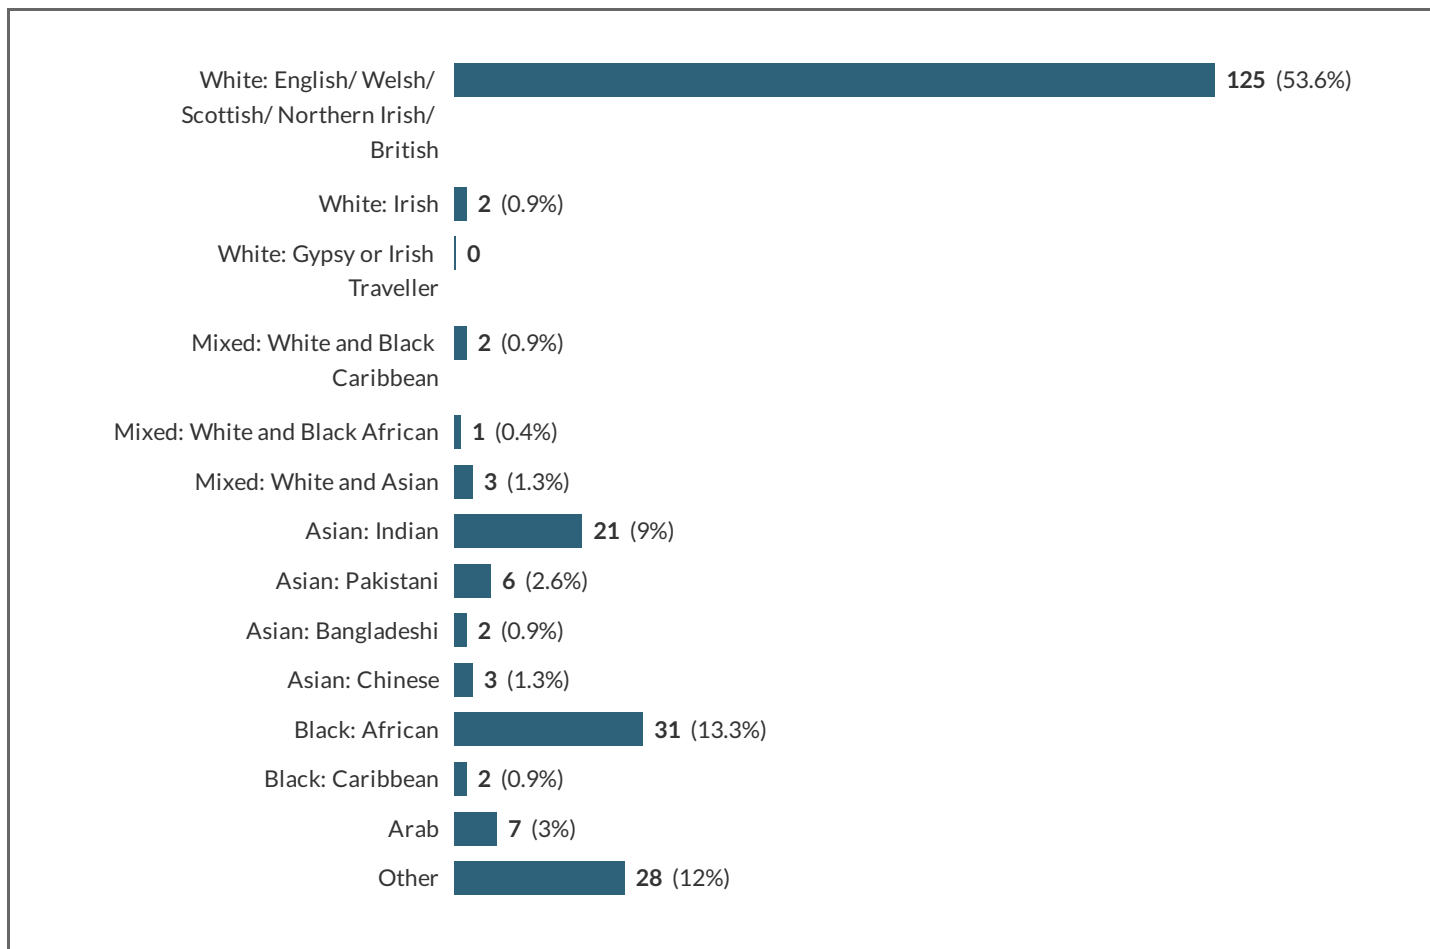

5.a If you selected Other, please specify your ethnic group:



| Showing all 28 responses  |                        |
|---------------------------|------------------------|
| White European            | 611710-611701-65339703 |
| Mixed: White              | 611710-611701-65339712 |
| White: Portuguese         | 611710-611701-65340365 |
| White British American    | 611710-611701-65340650 |
| White - Portuguese        | 611710-611701-65340898 |
| Tamil (Sri Lanka)         | 611710-611701-65341347 |
| Filipino                  | 611710-611701-65341995 |
| Mixed afro-euroasian      | 611710-611701-65342358 |
| White Bulgarian           | 611710-611701-65343532 |
| White other               | 611710-611701-65346039 |
| Afghan                    | 611710-611701-65348729 |
| White                     | 611710-611701-65353054 |
| White: Russian            | 611710-611701-65376195 |
| Asian: Thai               | 611710-611701-65380858 |
| White other               | 611710-611701-65407022 |
| Nepalese                  | 611710-611701-65420112 |
| White                     | 611710-611701-65483704 |
| Asian - pakistani/turkish | 611710-611701-65559487 |
| Western Europe            | 611710-611701-65590713 |
| white european            | 611710-611701-65605489 |
| White European            | 611710-611701-65618375 |
| polish                    | 611710-611701-65677803 |
| African                   | 611710-611701-65797593 |
| kurdish                   | 611710-611701-65838732 |
| White other               | 611710-611701-65880395 |
| Sri Lankan                | 611710-611701-65952652 |
| Other Asian background    | 611710-611701-65972122 |
| Other asian               | 611710-611701-66739149 |

## 6 Religion?

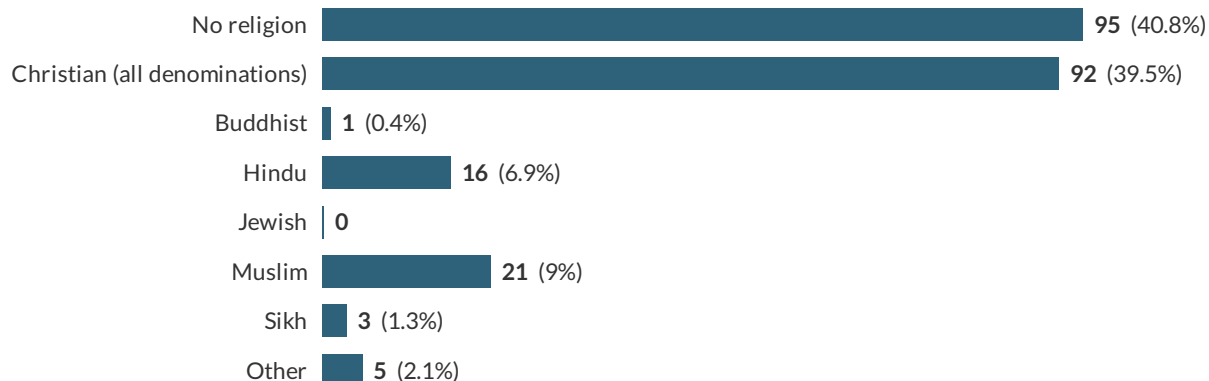

**6.a** If you selected Other, please specify your religion:

| Showing all 5 responses |                        |
|-------------------------|------------------------|
| Agnostic                | 611710-611701-65396871 |
| Pagan                   | 611710-611701-65434612 |
| Jain                    | 611710-611701-65697993 |
| Catholic Christian      | 611710-611701-65797593 |
| Pagan                   | 611710-611701-67254500 |

**7** EDUCATION: please choose one answer for each of the following questions. (important note: row 4 should say "your course" rather than specifically "medical school". Students studying any course can answer this question.)

**7.1** 1. At the Beginning of the lockdown period, you were provided with all the information needed to continue with your academic studies.

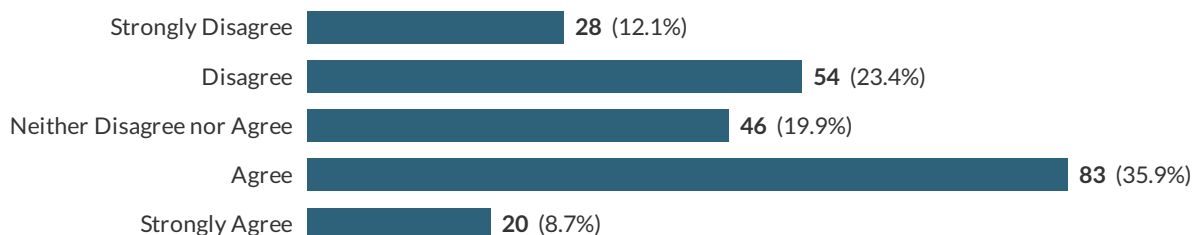

*Multi answer: Percentage of respondents who selected each answer option (e.g. 100% would represent that all this question's respondents chose that option)*

**7.2** 2. Sometimes you struggle to complete the learning outcomes in the context of the online delivery

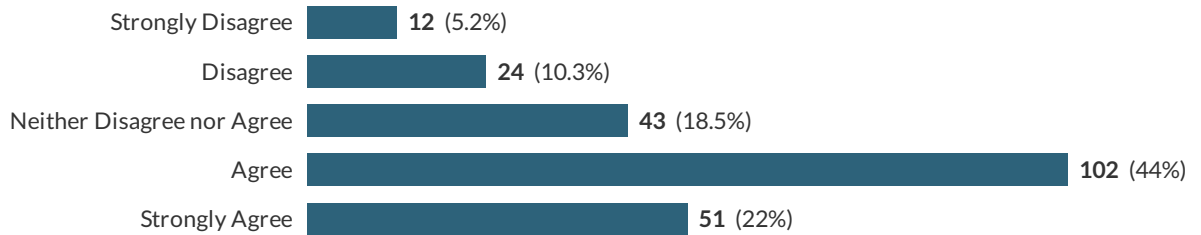

*Multi answer: Percentage of respondents who selected each answer option (e.g. 100% would represent that all this question's respondents chose that option)*

**7.3** 3. You are worried that your practical skills (e.g. clinical skills) will be affected.

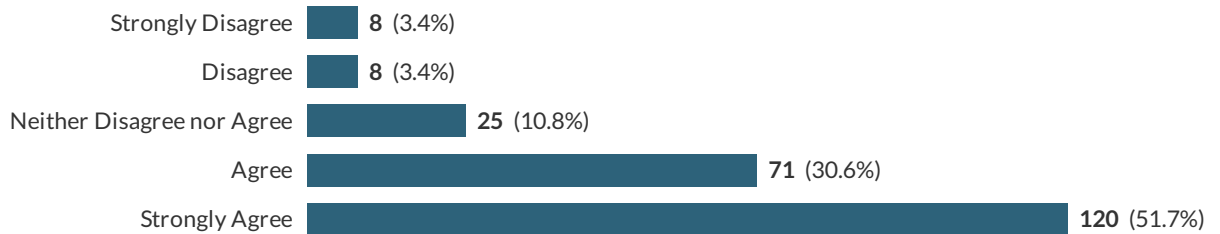

*Multi answer: Percentage of respondents who selected each answer option (e.g. 100% would represent that all this question's respondents chose that option)*

**7.4** 4. Since February 2020 (the start of the pandemic) you have considered leaving medical school.

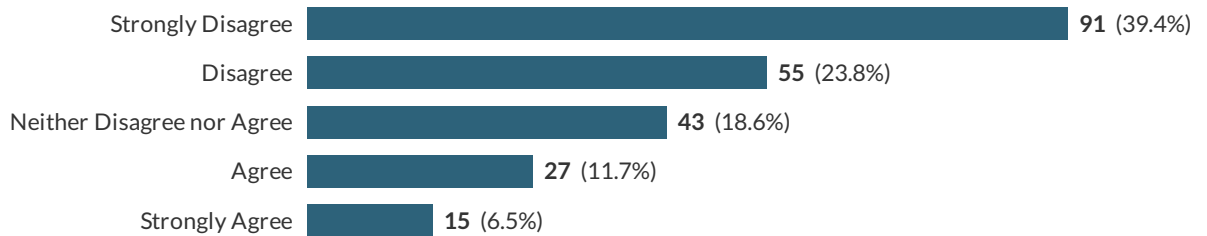

*Multi answer: Percentage of respondents who selected each answer option (e.g. 100% would represent that all this question's respondents chose that option)*

**7.5** 5. You are worried about the impact of COVID-19 might have on your future career.

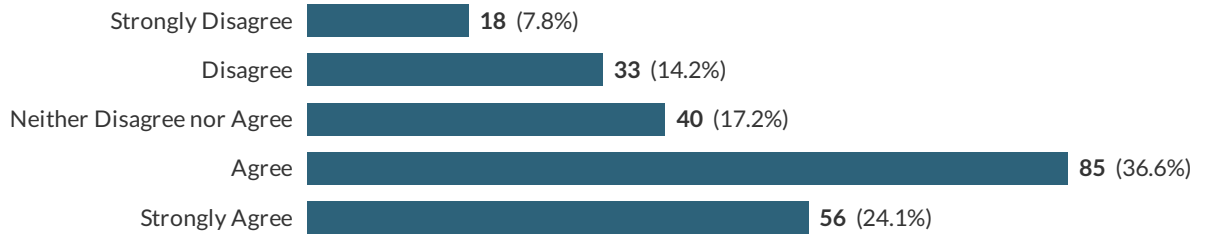

*Multi answer: Percentage of respondents who selected each answer option (e.g. 100% would represent that all this question's respondents chose that option)*

**7.6** 6. Your academic studies have been adequately supported since the start of the pandemic.

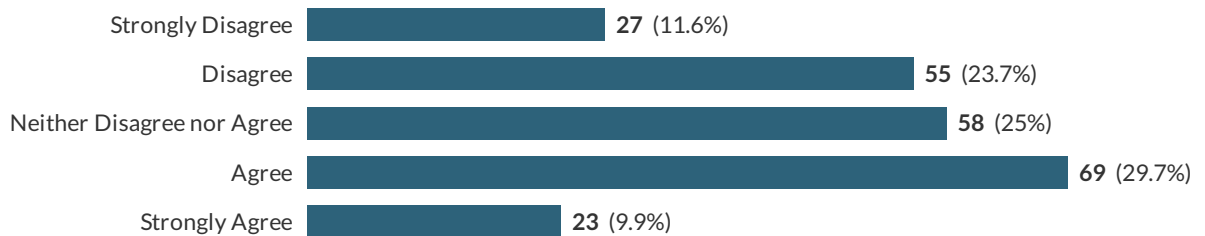

*Multi answer: Percentage of respondents who selected each answer option (e.g. 100% would represent that all this question's respondents chose that option)*

**7.7** 7. Online teaching and resources provided by the university has made up for cancelled face-to-face teaching, including placements.

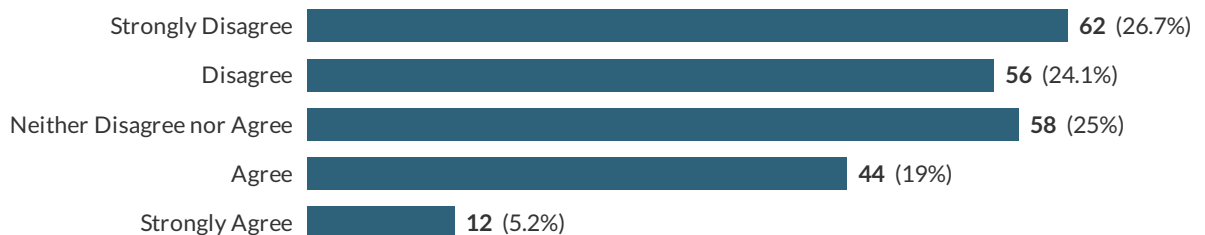

*Multi answer: Percentage of respondents who selected each answer option (e.g. 100% would represent that all this question's respondents chose that option)*

**7.8** 8. Lockdown online teaching compares well to conventional lectures prior to lockdown.

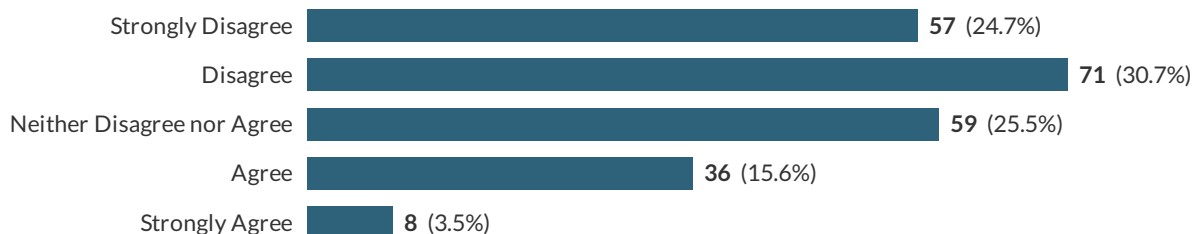

*Multi answer: Percentage of respondents who selected each answer option (e.g. 100% would represent that all this question's respondents chose that option)*

## 7.9 9. Online and virtual teaching and resources should be part of the standard curriculum even after lockdown ends.

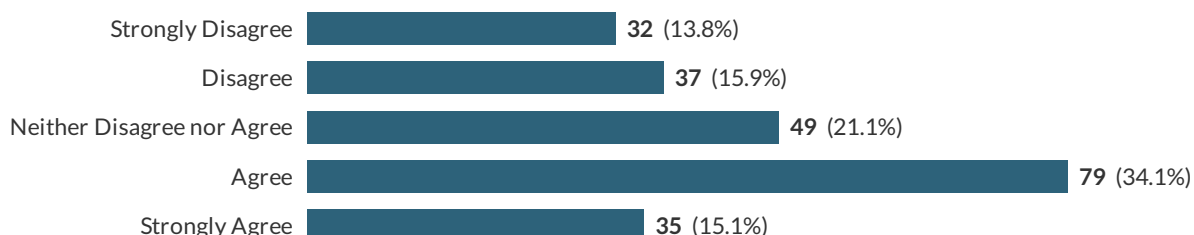

*Multi answer: Percentage of respondents who selected each answer option (e.g. 100% would represent that all this question's respondents chose that option)*

## 8 Any other comments regarding medical education:

| Showing all 42 responses                                                                                                                                                                                                                                                                                                                     |                        |
|----------------------------------------------------------------------------------------------------------------------------------------------------------------------------------------------------------------------------------------------------------------------------------------------------------------------------------------------|------------------------|
| Although online teaching went well considering the circumstances, I felt it lacked proper structure                                                                                                                                                                                                                                          | 611710-611701-63868315 |
| Access to resources such as OSMOSIS etc was very helpful!                                                                                                                                                                                                                                                                                    | 611710-611701-64905508 |
| There is too much practical session that I have missed out on that will not be made up for later.                                                                                                                                                                                                                                            | 611710-611701-64906133 |
|                                                                                                                                                                                                                                                                                                                                              | 611710-611701-64908178 |
| I found the zoom lectures very effective. Especially as I was able to rewatch the recordings of some subject I found more challenging. I have missed the clinical skills and anatomy lessons terribly and am worried about the impact of this, especially the clinical skills as there simply is no other way to practice these effectively. | 611710-611701-64910550 |
| None.                                                                                                                                                                                                                                                                                                                                        | 611710-611701-64913721 |
| Registered medical staff shouldn't have to do a PGCert to be able to teach full time and pass on medical knowledge as a lecturer                                                                                                                                                                                                             | 611710-611701-64921771 |

|                                                                                                                                                                                                                                                                                                                                                                                                                |                        |
|----------------------------------------------------------------------------------------------------------------------------------------------------------------------------------------------------------------------------------------------------------------------------------------------------------------------------------------------------------------------------------------------------------------|------------------------|
| So far I like how Year 3 is being delivered but in year 2 at the start of the lockdown they were veryyy late to give us the online lectures and resources we needed, they ended up having revision lectures a few days before our exams which left us very little time to revise! And I still don't understand Renal block, few people do                                                                      | 611710-611701-65238969 |
| I feel it is too early to ask these questions. My course hasn't started yet. My course ended in April and it was very new and scary for everyone then. I feel like communication could have been better , but haven't sampled any of the new online strategies yet. I am currently anxious about the upcoming year . Maybe ask these questions again in December ? I feel I'd be able to give a clearer answer | 611710-611701-65339708 |
| My course is non fave to face anyway. It is all online via distance learning.                                                                                                                                                                                                                                                                                                                                  | 611710-611701-65339765 |
| The classroom provides a distraction free peer supported environment of learning that I don't believe can be replicated via online learning.                                                                                                                                                                                                                                                                   | 611710-611701-65340293 |
| Learning Clinical skills on placement is really important and one of the main reasons I chose the course. Concerned I won't get enough experience during first year.                                                                                                                                                                                                                                           | 611710-611701-65340388 |
| Didn't receive proper online lectures. Just given Q+As and a small introduction each week about 10-30 minutes. Although we have fed this back to the course this week and they responded that they will change this and had been doing this for flexibility of the students, understandably. They apologised and said they will change it. So this issue is hopefully being sorted for future learning.        | 611710-611701-65339855 |
| Online learning cannot replace the valuable lessons learnt on clinical placement.                                                                                                                                                                                                                                                                                                                              | 611710-611701-65340939 |
| Online teaching resources have been adequate but can't in any way make up for the practical placement I missed out on. I also feel there has been a lack of guidance on returning to placement and what may happen in the future with placement for students if there is a second wave.                                                                                                                        | 611710-611701-65340848 |
| I don't go to medical school                                                                                                                                                                                                                                                                                                                                                                                   | 611710-611701-65341347 |
| The online teaching was extremely poor. But so was the delivery before lockdown.                                                                                                                                                                                                                                                                                                                               | 611710-611701-65341123 |
| The university should have just continued in September as not all student work well at home                                                                                                                                                                                                                                                                                                                    | 611710-611701-65339702 |
| I like the zoom lectures. I am concerned how this years delivery of work will work out for me as I'm a visual learner.                                                                                                                                                                                                                                                                                         | 611710-611701-65346751 |
| Please get us back full time like schools have done.                                                                                                                                                                                                                                                                                                                                                           | 611710-611701-65348617 |
| Research studies was very difficult for most students doing MBA healthcare management. There were no support and the lecturer not helpful at all. Most people failed the course due to not enough information.                                                                                                                                                                                                 | 611710-611701-65355362 |
| It is hard to comment on the online resources as I have only had one online lecture back in May. My year did not receive online teaching throughout the rest of lockdown.                                                                                                                                                                                                                                      | 611710-611701-65355666 |
| Working from home is ideal due to travel distance to university. But online lessons shockingly bad no direction, online library difficult to use no directions from university staff poor exam marking poor Direction on                                                                                                                                                                                       | 611710-611701-65351657 |

|                                                                                                                                                                                                                                                                                                                                                                                                                                              |                        |
|----------------------------------------------------------------------------------------------------------------------------------------------------------------------------------------------------------------------------------------------------------------------------------------------------------------------------------------------------------------------------------------------------------------------------------------------|------------------------|
| directions from university staff poor exam marking, poor direction on learning outcomes difficult to get support, disability SRA ignored.                                                                                                                                                                                                                                                                                                    |                        |
| I have no comments to write .                                                                                                                                                                                                                                                                                                                                                                                                                | 611710-611701-65363646 |
| stuff should consider students when marking their work because Covid-19 have had effect on study. Marking scheme should be lowered                                                                                                                                                                                                                                                                                                           | 611710-611701-65364335 |
| Online lectures has been beneficial for me as a mature student living at home                                                                                                                                                                                                                                                                                                                                                                | 611710-611701-65382930 |
| We received no support, very little teaching or communication and were left to try to learn what we needed to know with no guidance. As a result many of the class failed elements of the course and have to retest causing stress and anxiety as well as preventing us from progressing in our careers                                                                                                                                      | 611710-611701-65407022 |
| No                                                                                                                                                                                                                                                                                                                                                                                                                                           | 611710-611701-65423303 |
| N/a                                                                                                                                                                                                                                                                                                                                                                                                                                          | 611710-611701-65471517 |
| online teaching is definitely not a substitute to face-to-face teaching, but some aspects could be transitioned to online based easily.                                                                                                                                                                                                                                                                                                      | 611710-611701-65559487 |
| All changes have not been necessarily bad                                                                                                                                                                                                                                                                                                                                                                                                    | 611710-611701-65656449 |
| WHEN IS THIS PANDEMIC ENDING?                                                                                                                                                                                                                                                                                                                                                                                                                | 611710-611701-65684000 |
| No                                                                                                                                                                                                                                                                                                                                                                                                                                           | 611710-611701-65754244 |
| An a PhD student, I have mainly accessed supervisions online rather than training. I have access an online research conference and several training sessions. The support from my supervisors has been excellent. The support from the wider doctoral school has been average.                                                                                                                                                               | 611710-611701-66240947 |
| I feel like we have been left alone to self teach with only a few Q&A sessions with our lecturers. I expected more online lectures.                                                                                                                                                                                                                                                                                                          | 611710-611701-66738777 |
| I have found it hard learning online as I am a visual learner, but it is useful to have the online resources to go back too                                                                                                                                                                                                                                                                                                                  | 611710-611701-66766928 |
| Although I only started september so have no basis for comparison in ARU, i have attended university and gained an undergrad degree previously and ARU's standards are much higher, despite covid affecting education delivery. I have felt far more supported, far more educated and feel more on top of my studies than i did in my prior 3 year degree. This has also made childcare a lot easier as I do not have added commute time.    | 611710-611701-66948498 |
| none                                                                                                                                                                                                                                                                                                                                                                                                                                         | 611710-611701-66978483 |
| Powerpoints etc should be more closely monitored by faculty                                                                                                                                                                                                                                                                                                                                                                                  | 611710-611701-67046840 |
| It is difficult to make a comparison with face to face teaching as I have not experienced that yet. I think the main thing I am missing out on is interaction with my peers and teachers                                                                                                                                                                                                                                                     | 611710-611701-67064075 |
| Personal tutor should really help new student for at least for 4 weeks, MS teams should be use more frequently for lectures not recorded video for student with learning disability and also there student who are not outspoken, it does not mean they don't have a problem, hence personal tutor should do a 1:1 within that first 4 weeks of uni. also a follow email to check on our welfare and asked how we are doing once every term. | 611710-611701-67253342 |

**9** Since the start of the pandemic:**9.1** 10. Has your diet changed?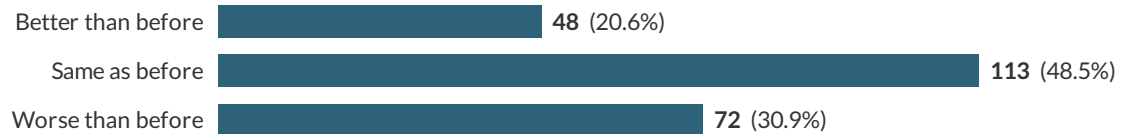

*Multi answer: Percentage of respondents who selected each answer option (e.g. 100% would represent that all this question's respondents chose that option)*

**10** Since the start of the pandemic:**10.1** 11. Do you now smoke?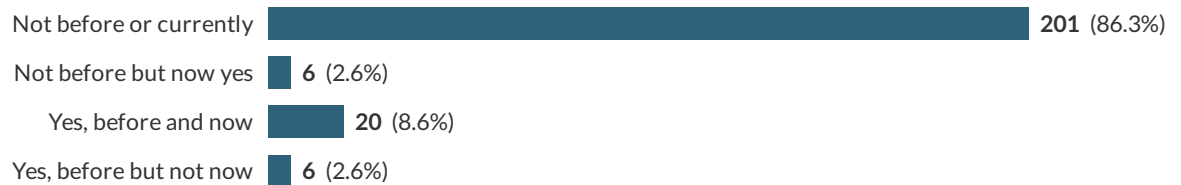

*Multi answer: Percentage of respondents who selected each answer option (e.g. 100% would represent that all this question's respondents chose that option)*

**11** Since the start of the pandemic:**11.1** 12. Has your level of physical activity changed?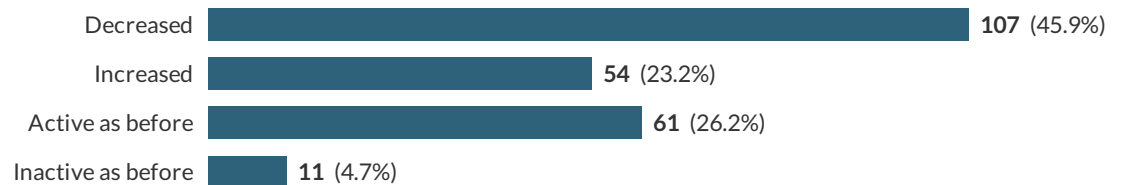

*Multi answer: Percentage of respondents who selected each answer option (e.g. 100% would represent that all this question's respondents chose that option)*



12 Any other comments regarding lifestyle & habits:

| Showing all 34 responses                                                                                                                              |                        |
|-------------------------------------------------------------------------------------------------------------------------------------------------------|------------------------|
| Sleep routine is worse now                                                                                                                            | 611710-611701-64905508 |
| I go to the gym less but I have a physically demanding day job                                                                                        | 611710-611701-64910550 |
| None.                                                                                                                                                 | 611710-611701-64913721 |
| Due to not wanting to share the train carriages with others I have begun cycling (15 miles) to get to my part time job                                | 611710-611701-64921771 |
| I go to the park a lot more, I exercise a lot more and spend more time outdoors which is great                                                        | 611710-611701-65238969 |
| Regular sleep schedule. Not driving tired.                                                                                                            | 611710-611701-65340410 |
| Very tired, no energy, been at home for so long, now finding it extremely overwhelming coming back to placement                                       | 611710-611701-65339954 |
| Not much choice for indoors activities.                                                                                                               | 611710-611701-65343532 |
| Noticed my mood swings are more noticeable. Having bouts of mind depression where I sit and do nothing all day when is there is plenty of jobs to do. | 611710-611701-65346751 |
| Generally happened around summer so more free time therefore more active lifestyle                                                                    | 611710-611701-65363079 |
| Sleeping patterns worsened unable to get to sleep and stay asleep                                                                                     | 611710-611701-65363373 |
| Good life style                                                                                                                                       | 611710-611701-65363646 |
| stuck in my room, no where to go but to work                                                                                                          | 611710-611701-65376195 |
| Being at home more has enabled me to become more proactive                                                                                            | 611710-611701-65382930 |
| No                                                                                                                                                    | 611710-611701-65423303 |
| consuming more alcohol than before and eating fast foods.                                                                                             | 611710-611701-65430088 |
| i eat more vegetables now than before and more exercises                                                                                              | 611710-611701-65443108 |
| N/a                                                                                                                                                   | 611710-611701-65471517 |
| During exams, my activity decreased. But since then, I have resumed my normal activity. 3 workouts a week.                                            | 611710-611701-65512965 |
| quarantine gave me more time to focus on my health and fitness which im up-keeping now at uni                                                         | 611710-611701-65559487 |
| Levels of inactivity/activity fluctuated quite dramatically throughout the pandemic, this is true of diet too                                         | 611710-611701-65632523 |
| Having more time to myself to focus on fitness                                                                                                        | 611710-611701-65656449 |
| I have taken more time for myself and started new activities such as yoga to stay mentally healthy during this stressful period                       | 611710-611701-65657915 |
| NO                                                                                                                                                    | 611710-611701-65684000 |

|                                                                                                                                                                                                                                                                                                                                                                   |                        |
|-------------------------------------------------------------------------------------------------------------------------------------------------------------------------------------------------------------------------------------------------------------------------------------------------------------------------------------------------------------------|------------------------|
| No                                                                                                                                                                                                                                                                                                                                                                | 611710-611701-65754244 |
| having lectures online decreases the amount of activity i do                                                                                                                                                                                                                                                                                                      | 611710-611701-65953035 |
| I think these questions don't really fully capture the experience over the 6 months. From March to August, I didn't exercise or eat well, I put on significant weight and started to struggle with anxiety and depression. From August, I have been exercising 4 times a week and eating healthily. This is following a course of CBT and as gyms have re-opened. | 611710-611701-66240947 |
| Adopted more unhealthy behaviours in terms of sleep cycle.                                                                                                                                                                                                                                                                                                        | 611710-611701-66753644 |
| I am a lot happier to spend my time at home with my family rather than trying to visit people and go out to entertain the children, I feel less pressured to socialise                                                                                                                                                                                            | 611710-611701-66948498 |
| Sleeping patterns have altered, and I am sleeping later. Eating healthier but that is because I wasn't wasting healthily last year anyway.                                                                                                                                                                                                                        | 611710-611701-67046848 |
| I have been comfort eating a lot more which has impacted my mental health, however is a vicious circle as at the time it seems to make me feel happier                                                                                                                                                                                                            | 611710-611701-67064075 |
| I am very active. I usually go to the gym 6 times a week. During lockdown when gyms were closed it was a struggle.                                                                                                                                                                                                                                                | 611710-611701-67189021 |
| I stress eat and have a low metabolism. With limited access to gyms, I have been unable to keep up my fitness.                                                                                                                                                                                                                                                    | 611710-611701-67254500 |
| no                                                                                                                                                                                                                                                                                                                                                                | 611710-611701-67272372 |

### 13 How has lockdown affected your emotions, feelings and certain aspects of your life?

#### 13.1 13. Sadness

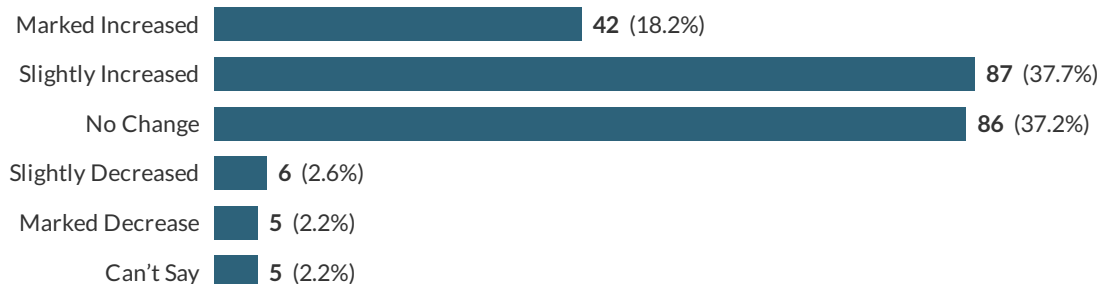

*Multi answer: Percentage of respondents who selected each answer option (e.g. 100% would represent that all this question's respondents chose that option)*

#### 13.2 14. Irritability

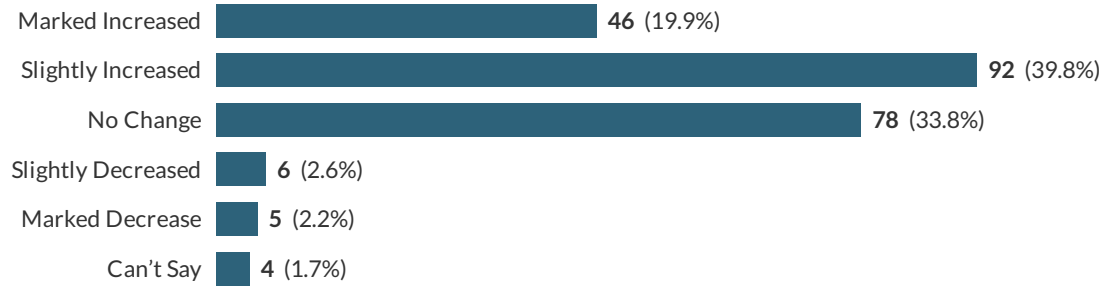

*Multi answer: Percentage of respondents who selected each answer option (e.g. 100% would represent that all this question's respondents chose that option)*

### 13.3 15. Fatigue

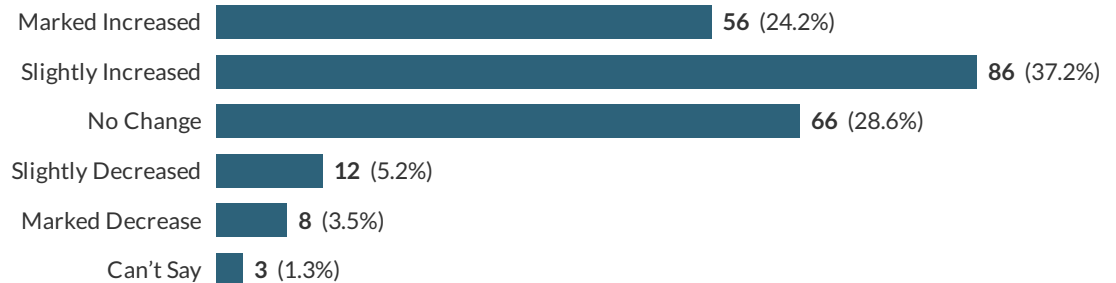

*Multi answer: Percentage of respondents who selected each answer option (e.g. 100% would represent that all this question's respondents chose that option)*

### 13.4 16. Frustration

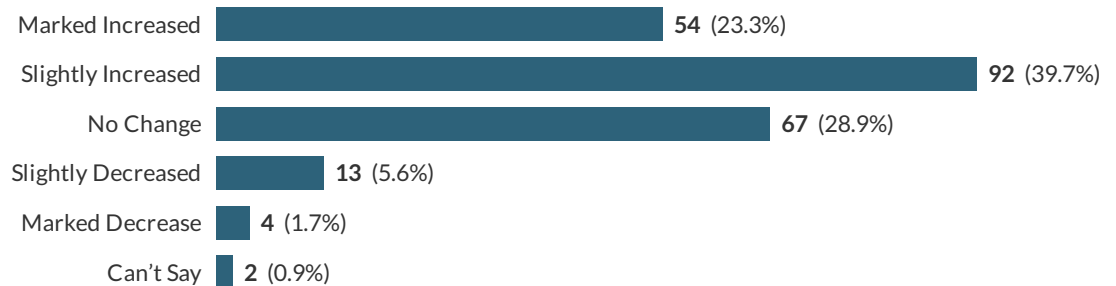

*Multi answer: Percentage of respondents who selected each answer option (e.g. 100% would represent that all this question's respondents chose that option)*

### 13.5 17. Loneliness

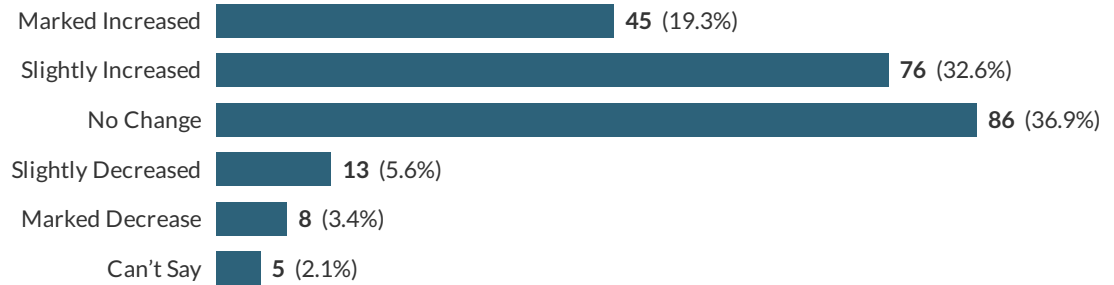

*Multi answer: Percentage of respondents who selected each answer option (e.g. 100% would represent that all this question's respondents chose that option)*

## 13.6 18. Sleep

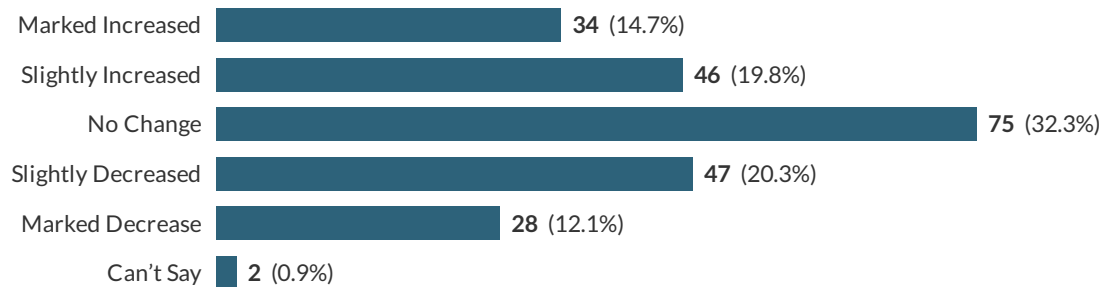

*Multi answer: Percentage of respondents who selected each answer option (e.g. 100% would represent that all this question's respondents chose that option)*

## 13.7 19. Appetite

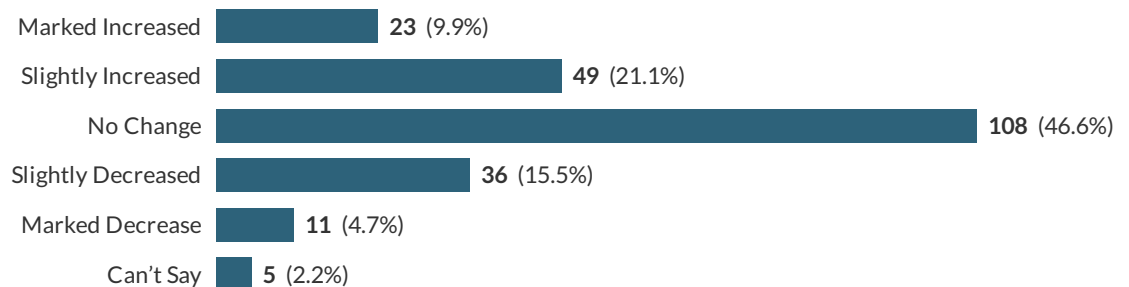

*Multi answer: Percentage of respondents who selected each answer option (e.g. 100% would represent that all this question's respondents chose that option)*

**14** The following questions ask you about your feelings throughout the lockdown. In each case, please answer how often you felt or thought a certain way.

14.1 20. How often have you felt nervous and 'stressed'?

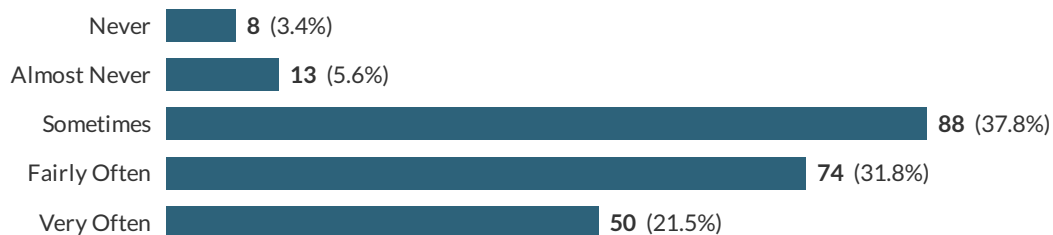

*Multi answer: Percentage of respondents who selected each answer option (e.g. 100% would represent that all this question's respondents chose that option)*

14.2 21. How often have you felt confident in your ability to handle your personal problems?

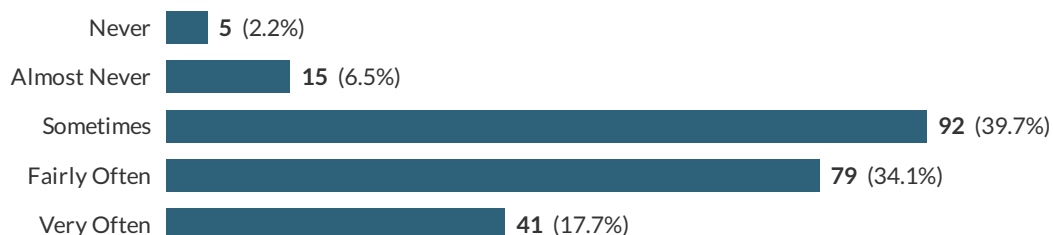

*Multi answer: Percentage of respondents who selected each answer option (e.g. 100% would represent that all this question's respondents chose that option)*

14.3 22. How often have you found that you could not cope with all the things you had to do?

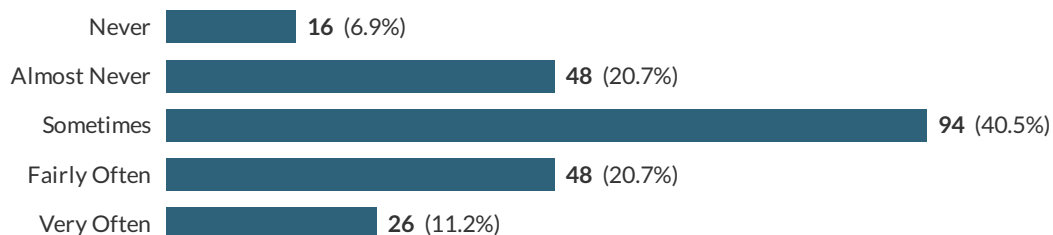

*Multi answer: Percentage of respondents who selected each answer option (e.g. 100% would represent that all this question's respondents chose that option)*

15 Please respond to the following in terms of how you feel:

15.1 23. Feeling detached from others.

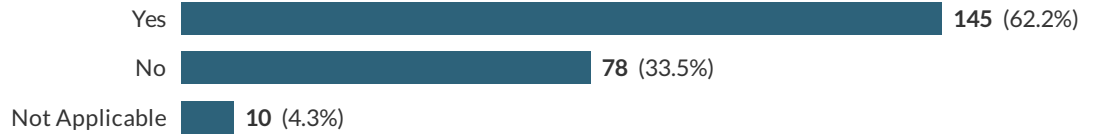

Multi answer: Percentage of respondents who selected each answer option (e.g. 100% would represent that all this question's respondents chose that option)

## 15.2 24. Poor concentration and felt indecisive.

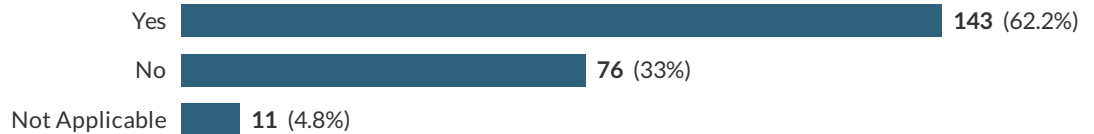

Multi answer: Percentage of respondents who selected each answer option (e.g. 100% would represent that all this question's respondents chose that option)

## 15.3 25. Deteriorating work performance.

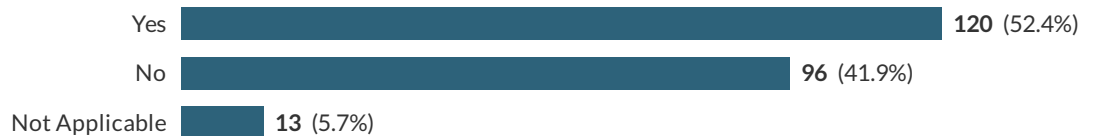

Multi answer: Percentage of respondents who selected each answer option (e.g. 100% would represent that all this question's respondents chose that option)

## 16 Throughout the lockdown, how often have you been affected by the following problems?

### 16.1 26. Feeling nervous, anxious, or on edge.

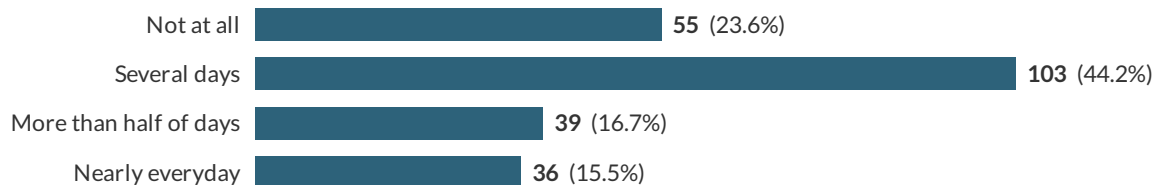

Multi answer: Percentage of respondents who selected each answer option (e.g. 100% would represent that all this question's respondents chose that option)

### 16.2 27. Worrying too much about different things.

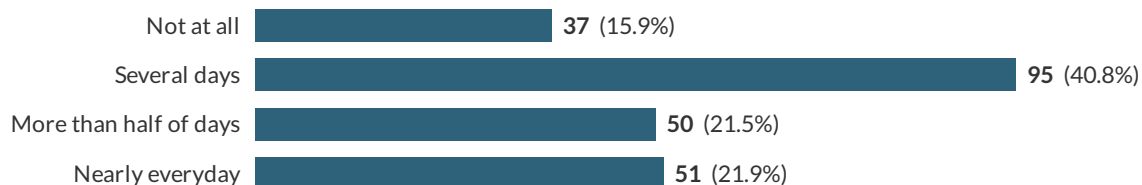

*Multi answer: Percentage of respondents who selected each answer option (e.g. 100% would represent that all this question's respondents chose that option)*

### 16.3 28. Trouble relaxing.

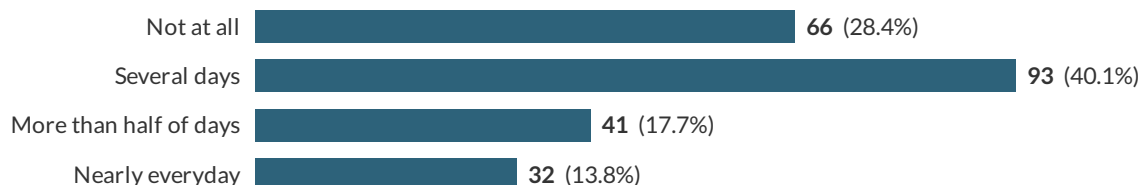

*Multi answer: Percentage of respondents who selected each answer option (e.g. 100% would represent that all this question's respondents chose that option)*

### 16.4 29. Becoming easily annoyed or irritable.

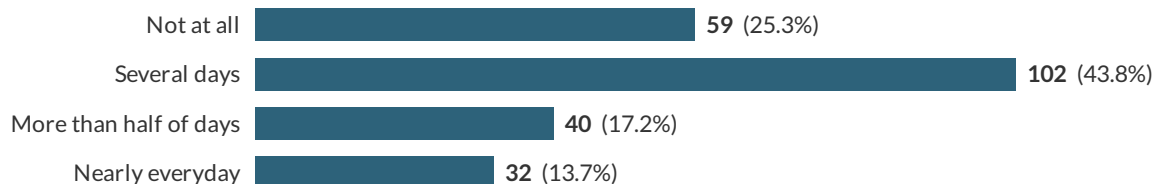

*Multi answer: Percentage of respondents who selected each answer option (e.g. 100% would represent that all this question's respondents chose that option)*

### 16.5 30. Feeling afraid, as if something awful might happen.

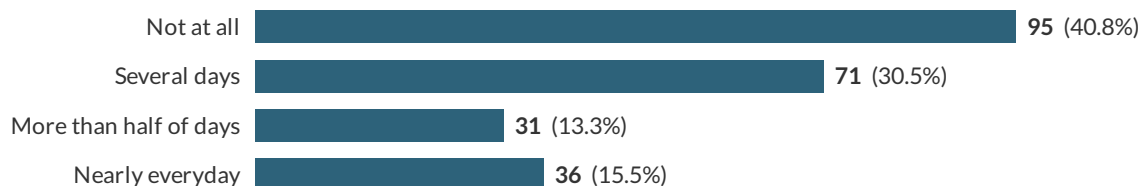

*Multi answer: Percentage of respondents who selected each answer option (e.g. 100% would represent that all this question's respondents chose that option)*

## 16.6 31. Not being able to stop or control worrying.

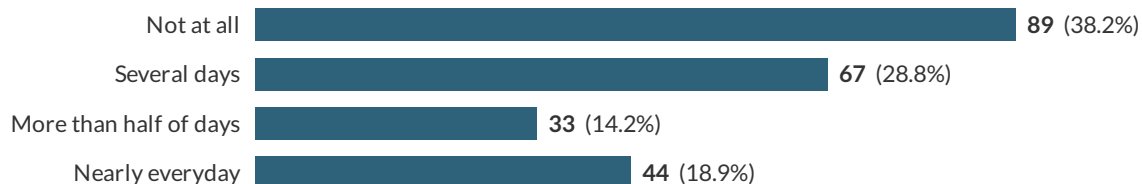

*Multi answer: Percentage of respondents who selected each answer option (e.g. 100% would represent that all this question's respondents chose that option)*

## 17 Any other comments regarding mental health:

| Showing all 24 responses                                                                                                                                                                                                                                                                          |                                        |
|---------------------------------------------------------------------------------------------------------------------------------------------------------------------------------------------------------------------------------------------------------------------------------------------------|----------------------------------------|
| Having had COVID-19, I experienced these issues on top of the symptoms which came with the disease.                                                                                                                                                                                               | <a href="#">611710-611701-64913721</a> |
| I'm usually a strong minded person and so dealt with the pandemic head on by working in the nhs to help so have found it a learning experience for future practice rather than being worried about the virus                                                                                      | <a href="#">611710-611701-64921771</a> |
| George Floyd and the racism in British society has severely worsened my mental health far worse than Covid                                                                                                                                                                                        | <a href="#">611710-611701-65238969</a> |
| Normally my family go to work/ school so I am left alone. Having them all home was amazing.                                                                                                                                                                                                       | <a href="#">611710-611701-65339765</a> |
| I am diagnosed with anxiety and previous depression in 2019 and have help from my Dr with medication and counselling sessions to control this                                                                                                                                                     | <a href="#">611710-611701-65339824</a> |
| I do have already existing mental health issues, but they've been more pronounced around lockdown and online learning                                                                                                                                                                             | <a href="#">611710-611701-65339804</a> |
| Lockdown enabled greater self care so mental healthy improved                                                                                                                                                                                                                                     | <a href="#">611710-611701-65340410</a> |
| I have a history of depression and anxiety but had been coping well prior to lockdown. However, due to the pressures of lockdown, I had to be prescribed anxiety medication once again, which I continue to take.                                                                                 | <a href="#">611710-611701-65340848</a> |
| Treatment from university course in regards to exams with zero responsibility with their reckless marking. Blaming students for poor teaching mental health is dramatically worse since receiving the latest results no accountability from the lecturers no support you need to get it yourself. | <a href="#">611710-611701-65351657</a> |
| I do have anxiety with ocd tendencies, so the feelings are quite normal for me                                                                                                                                                                                                                    | <a href="#">611710-611701-65380858</a> |



|                                                                                                                                                                                                                                                                                                                                                                                                                                                                                                                                                                                                                                                                                              |                        |
|----------------------------------------------------------------------------------------------------------------------------------------------------------------------------------------------------------------------------------------------------------------------------------------------------------------------------------------------------------------------------------------------------------------------------------------------------------------------------------------------------------------------------------------------------------------------------------------------------------------------------------------------------------------------------------------------|------------------------|
| No                                                                                                                                                                                                                                                                                                                                                                                                                                                                                                                                                                                                                                                                                           | 611710-611701-65423303 |
| N/a                                                                                                                                                                                                                                                                                                                                                                                                                                                                                                                                                                                                                                                                                          | 611710-611701-65471517 |
| my worries were due to other things, not lockdown/covid itself. but being in lockdown gave me more time to think about these other issues which inevitably exacerbated these worries                                                                                                                                                                                                                                                                                                                                                                                                                                                                                                         | 611710-611701-65559487 |
| Lockdown gave good time to reflect                                                                                                                                                                                                                                                                                                                                                                                                                                                                                                                                                                                                                                                           | 611710-611701-65656449 |
| the pressure has been too much,I am struggling to complete my degree, i didn't find online tutorials sufficient to receive appropriate support with my dissertation, the library was closed and i was resorted to writing my final piece in the crowded café at my local gym, i lost the childcare, i could not gain access to some vital reading material! overwhelmed!                                                                                                                                                                                                                                                                                                                     | 611710-611701-65677803 |
| NO                                                                                                                                                                                                                                                                                                                                                                                                                                                                                                                                                                                                                                                                                           | 611710-611701-65684000 |
| I would have what I would describe as a global anxiety re the Covid situation. I felt guilty about sitting down and working on my thesis as I felt this time was only available through the suffering on individuals and society as a whole.                                                                                                                                                                                                                                                                                                                                                                                                                                                 | 611710-611701-65695895 |
| No                                                                                                                                                                                                                                                                                                                                                                                                                                                                                                                                                                                                                                                                                           | 611710-611701-65754244 |
| I just feel communication on line is not real and sound artificial to me, am not connecting well and afraid of not reaching my grades. An example is when I mistakenly posted my assignment on time but in the wrong box on turnitin, I have been made known it will be recorded as non submission. That alone worries me so much, its not right.                                                                                                                                                                                                                                                                                                                                            | 611710-611701-65797593 |
| I would say it is the first time that I have felt significantly anxious. My sleep was heavily affected at the beginning of the pandemic. I think it was due to there being so many unknowns eg how bad will this be, how will my children be affected, when will i be able to see my family. My studies I would say were more towards the bottom of my 'worry list' which I think is a reflection of the good support we got from ARU. I felt the university did the best they could in such unprecedented times. I remember being in my final lecture before lock down when we got the news that our faculty was closing and this was the first time that I thought things are getting bad. | 611710-611701-66034596 |
| As previously mentioned, lock-down and the stress of my PhD caused me to develop moderate anxiety & depression. I have since sought support from the well-being service.                                                                                                                                                                                                                                                                                                                                                                                                                                                                                                                     | 611710-611701-66240947 |
| I have struggled with anxiety and some bouts of depression, i feel lockdown has improved my mental wellbeing a lot, I no longer have regular panic attacks and feel much more able to control my anxiety than before                                                                                                                                                                                                                                                                                                                                                                                                                                                                         | 611710-611701-66948498 |
| I found it has deteriorated generally, but more so after we left lockdown and I realised the effect of lockdown on me. During lockdown I didn't really feel the effects as I was cushioned by being surrounded by family at home                                                                                                                                                                                                                                                                                                                                                                                                                                                             | 611710-611701-67046848 |
| no                                                                                                                                                                                                                                                                                                                                                                                                                                                                                                                                                                                                                                                                                           | 611710-611701-67272372 |

**18** Please choose one answer for each of the following questions.

## 18.1 32. Have any of your close contacts tested positive for COVID-19?

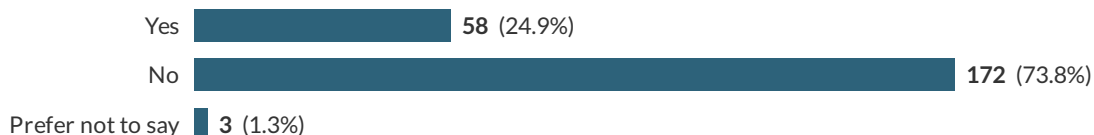

*Multi answer: Percentage of respondents who selected each answer option (e.g. 100% would represent that all this question's respondents chose that option)*

## 19 Any other comments:

| Showing all 21 responses                                                                                                                                                                                                                                                                                                                                                                                                                                                                                                                                                                                                                                                                                                                     |                        |
|----------------------------------------------------------------------------------------------------------------------------------------------------------------------------------------------------------------------------------------------------------------------------------------------------------------------------------------------------------------------------------------------------------------------------------------------------------------------------------------------------------------------------------------------------------------------------------------------------------------------------------------------------------------------------------------------------------------------------------------------|------------------------|
| Testing was not widespread at the time of my infection with SARS-CoV-2. NHS 111 told me to isolate (at university) and so I did not get tested; however, the symptoms I had were exactly as described (and more) by the NHS and PHE. My family was safe at home and did not have symptoms.                                                                                                                                                                                                                                                                                                                                                                                                                                                   | 611710-611701-64913721 |
| Me and my mum                                                                                                                                                                                                                                                                                                                                                                                                                                                                                                                                                                                                                                                                                                                                | 611710-611701-64928259 |
| Lost my mother to covid                                                                                                                                                                                                                                                                                                                                                                                                                                                                                                                                                                                                                                                                                                                      | 611710-611701-65339690 |
| Lost family members and a few close friends to Covid. My friend circle is mostly doctors, and I've lost many of them.                                                                                                                                                                                                                                                                                                                                                                                                                                                                                                                                                                                                                        | 611710-611701-65339978 |
| No but I have close family in the shielding category which is a big concern for me, especially with returning to clinical placement.                                                                                                                                                                                                                                                                                                                                                                                                                                                                                                                                                                                                         | 611710-611701-65340848 |
| 90 year old grandad in a care home contracted the virus                                                                                                                                                                                                                                                                                                                                                                                                                                                                                                                                                                                                                                                                                      | 611710-611701-65342802 |
| By far the worst university experience, lecturers Always make reference to the fact we are the lesser course as the bsc course is better, the exams were a shambles the question paper needs to be binned questions asked and answered to only find in marking that there were hidden questions in the question. Essays no guidance on writing them, you access library for referencing and then get marked wrong, on checking library you are right. I could not recommend this university for study and will actively discourage people considering study here. Disability discrimination by the university takes place, and because my work place paid for the study you are treated less favourably including being tested for dyslexia. | 611710-611701-65351657 |
| My crew mate caught COVID whilst we were at work.                                                                                                                                                                                                                                                                                                                                                                                                                                                                                                                                                                                                                                                                                            | 611710-611701-65356103 |
| My friends have and my friends father passed away from COVID                                                                                                                                                                                                                                                                                                                                                                                                                                                                                                                                                                                                                                                                                 | 611710-611701-65360204 |
| I had covid syptoms but didn't get tested.                                                                                                                                                                                                                                                                                                                                                                                                                                                                                                                                                                                                                                                                                                   | 611710-611701-65363373 |
| GR56ONP                                                                                                                                                                                                                                                                                                                                                                                                                                                                                                                                                                                                                                                                                                                                      | 611710-611701-65365724 |
| No                                                                                                                                                                                                                                                                                                                                                                                                                                                                                                                                                                                                                                                                                                                                           | 611710-611701-65423303 |
| colleague                                                                                                                                                                                                                                                                                                                                                                                                                                                                                                                                                                                                                                                                                                                                    | 611710-611701-65430088 |
| N/a                                                                                                                                                                                                                                                                                                                                                                                                                                                                                                                                                                                                                                                                                                                                          | 611710-611701-65471517 |

|                                                                                                                                   |                        |
|-----------------------------------------------------------------------------------------------------------------------------------|------------------------|
| I was COVID+                                                                                                                      | 611710-611701-65632523 |
| IS COVID 19 REAL AS THE MEDIA PORTRAIT IT TO BE?                                                                                  | 611710-611701-65684000 |
| No                                                                                                                                | 611710-611701-65754244 |
| None of my close contacts have taken a test.                                                                                      | 611710-611701-66753644 |
| My aunt was hospitalised twice, once initially and the second time as her treatment was unable to shift the fluid from her lungs. | 611710-611701-67046848 |
| Some questions were negatively orientated. Perhaps to remove bias. Phrase them in a neutral manner?                               | 611710-611701-67046840 |
| Consider including positives of COVID too?                                                                                        |                        |
| no                                                                                                                                | 611710-611701-67272372 |
